# Supplementary material for: Light driven asymmetric polymerization: an approach for tele-control reaction
Source: Royal Society of Chemistry journal article supplement (doi:10.1039/c0py00396d), 2011-01-01
Supplement: c0py00396d.pdf [file c0py00396d.pdf]

Supplementary information for:

# Light driven asymmetric polymerization: an approach for tele-control reaction

Hiromasa Goto\*, Kohsuke Kawabata

Institute of Materials Science, Graduate School of Pure and Applied Sciences,  
University of Tsukuba, Tsukuba, Ibaraki, 305-8573 Japan.

\*Correspondence to H. Goto, e-mail: [gotoh@ims.tsukuba.ac.jp](mailto:gotoh@ims.tsukuba.ac.jp)

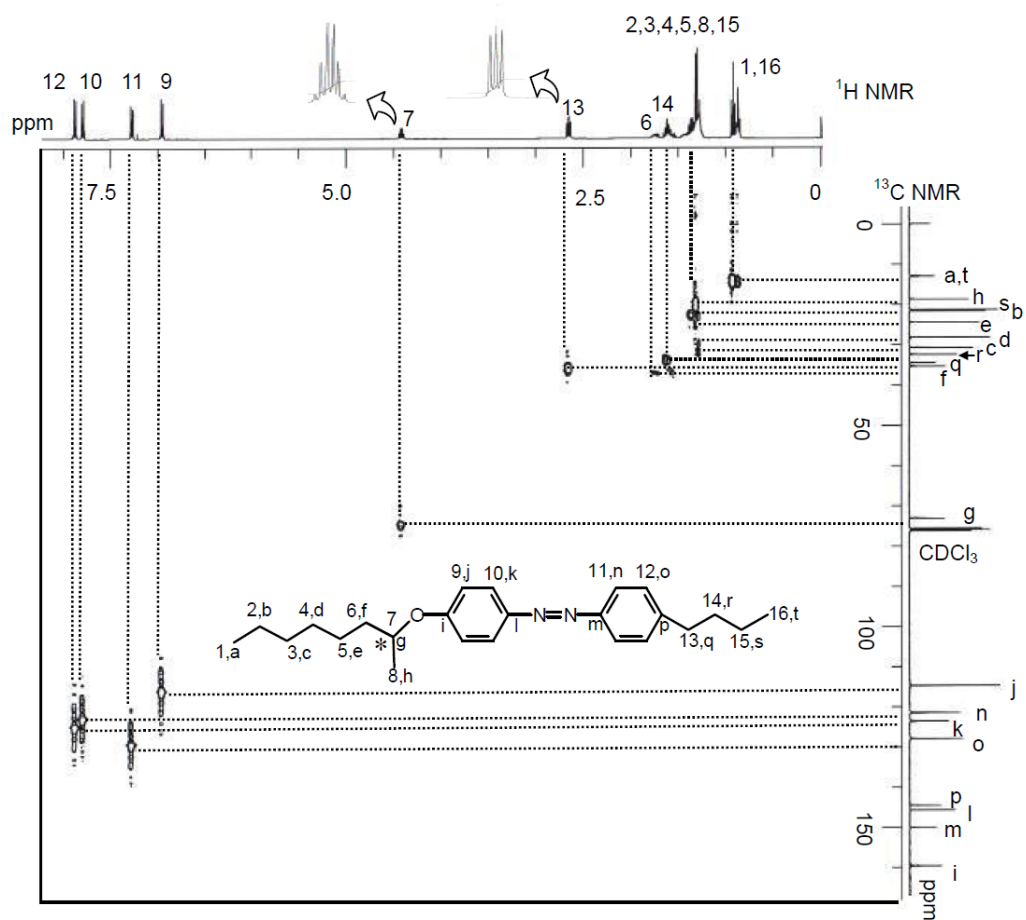

**Fig. S1.** Heteronuclear Multiple Quantum Coherence (HMQC) 2-D  $^1\text{H}$ - $^{13}\text{C}$  correlation NMR spectrum of AZO\*.

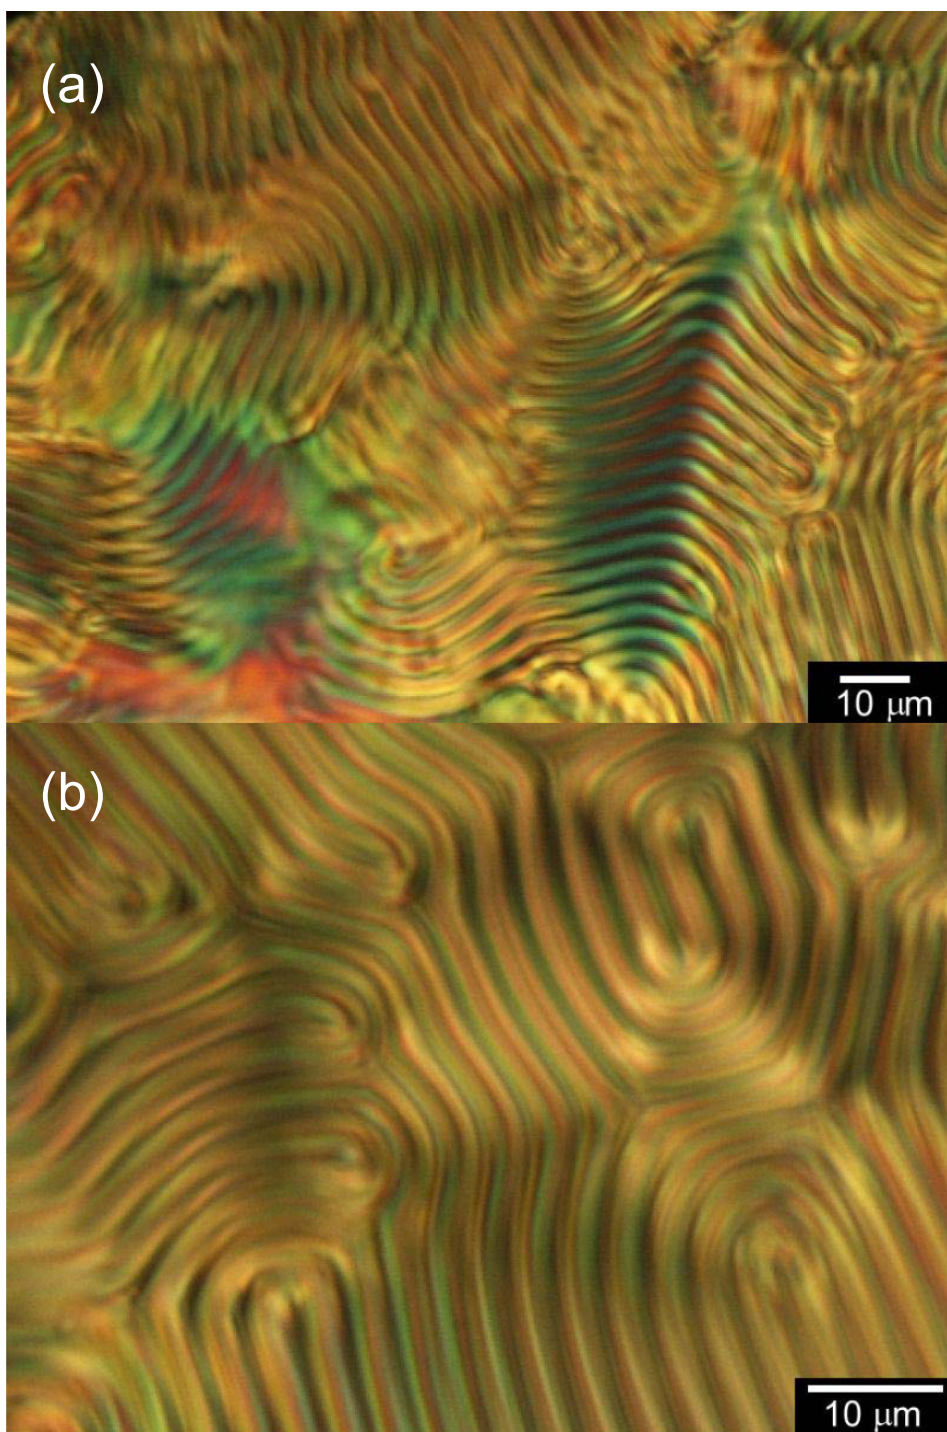

**Fig. S2.** POM images of monomer-free LC solution containing AZO\* (20 mg) in 6CB (0.3 g) at 25 °C. (a) 500 x, (b) 1000 x.

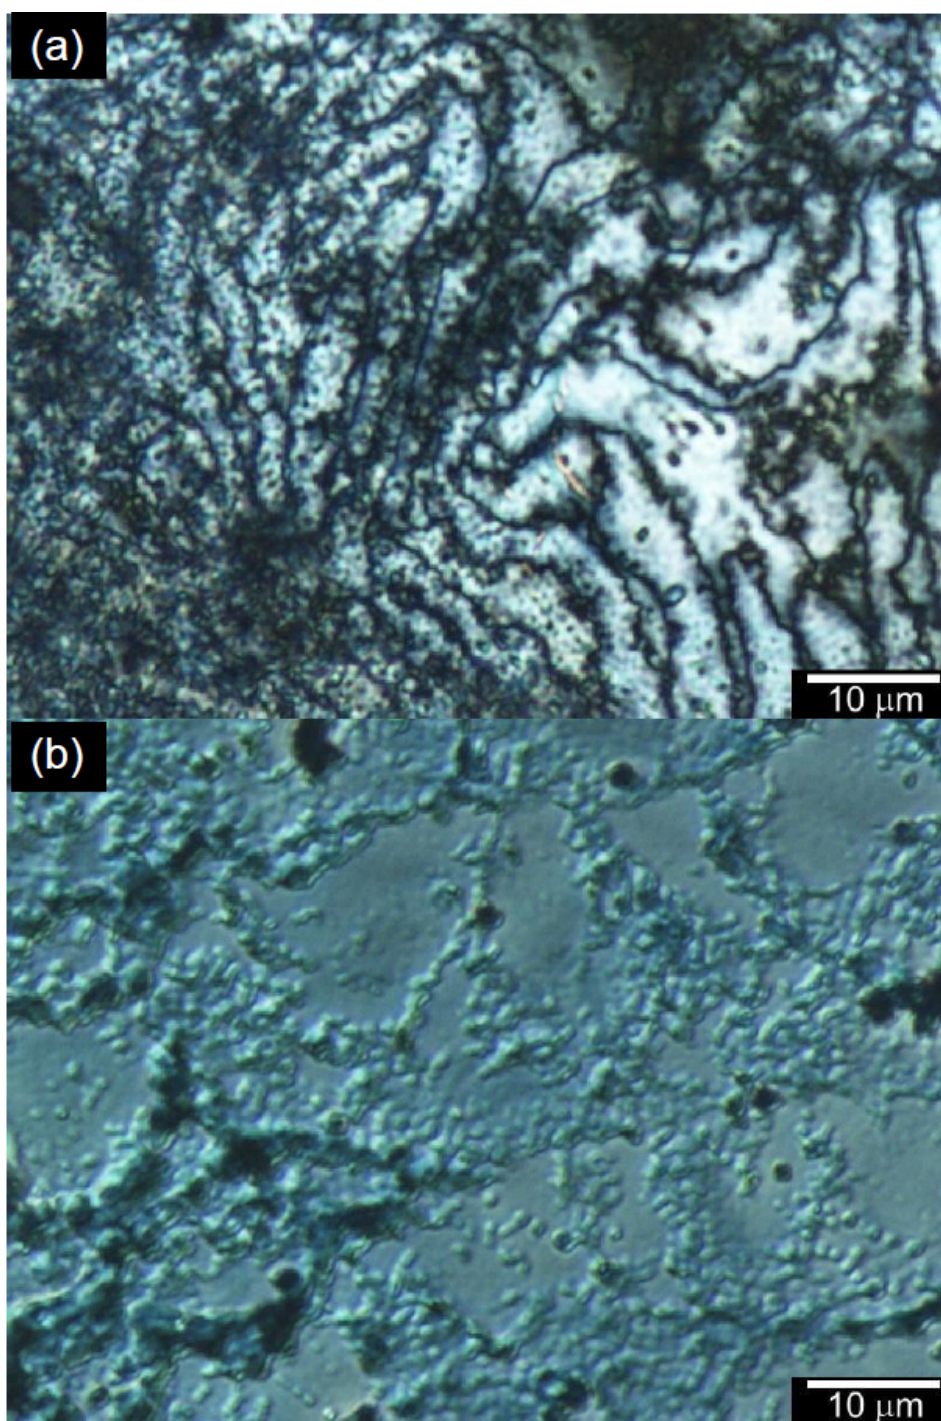

**Fig. S3.** Differential interference microscopic (DIM) images of *PterEDOT* prepared under light irradiation. (a) *PterEDOT* showing Schlieren texture. (b) *PterEDOT* showing no birefringence.

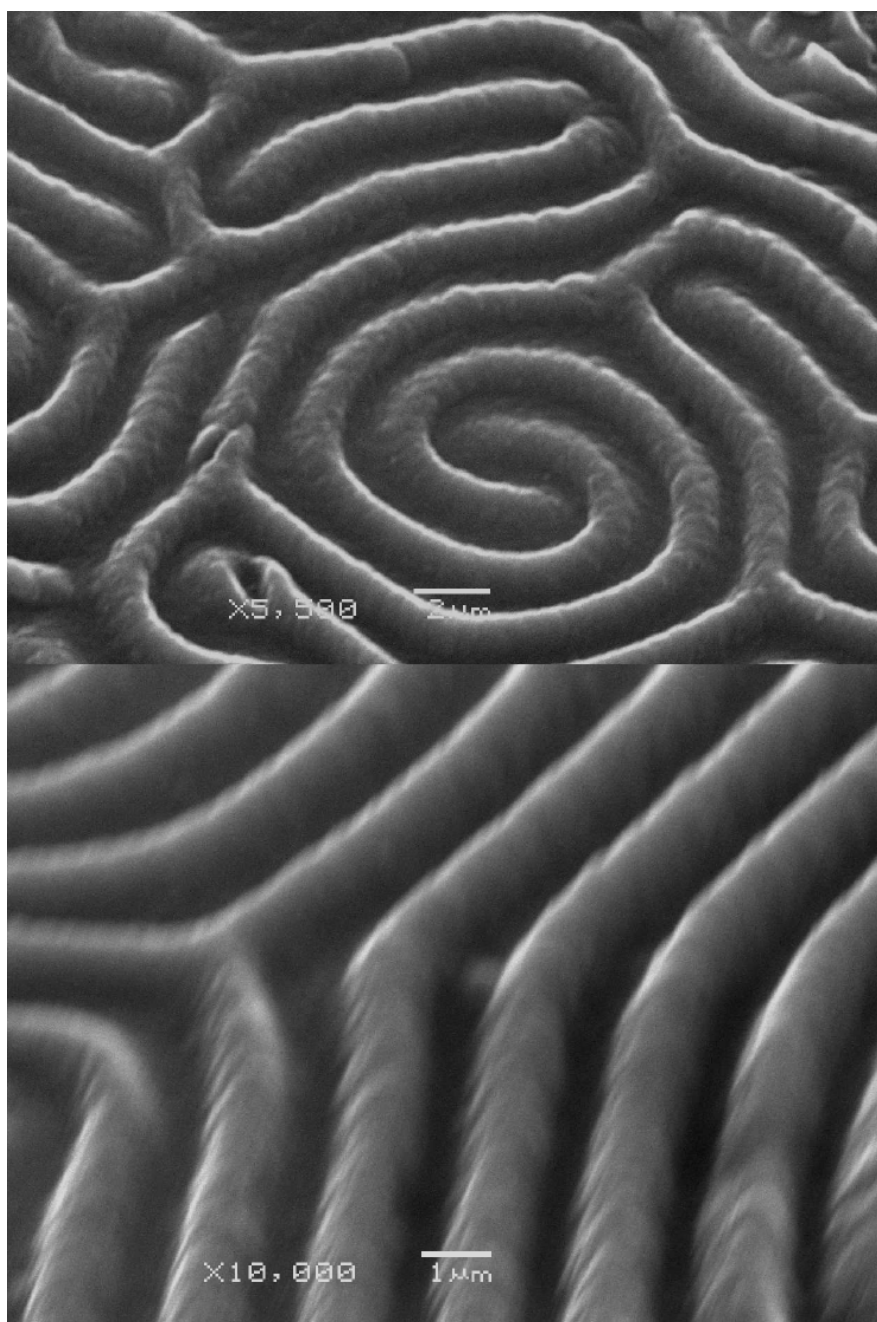

**Fig. S4.** SEM images of PFFLF prepared under Vis light (PFFLF(Vis)).

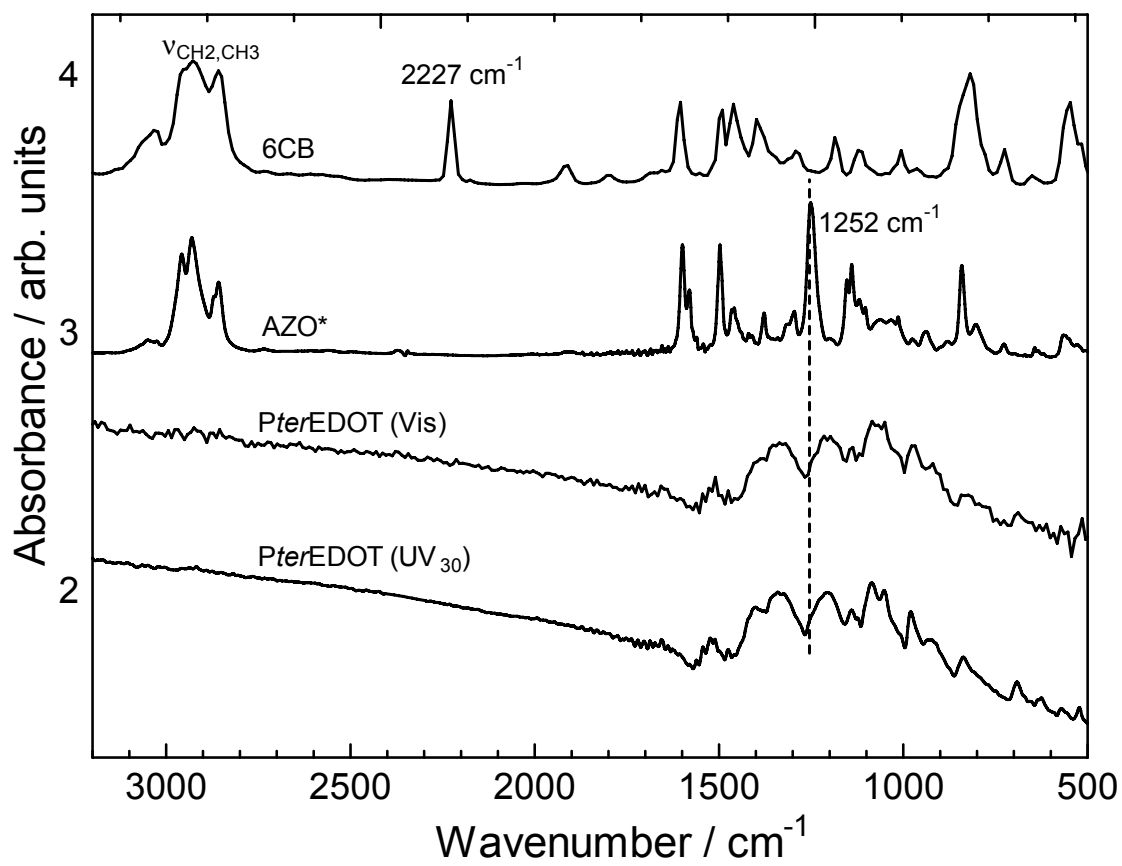

**Fig. S5.** IR absorption spectra of 6CB, AZO\*, PterEDOT(Vis), and PterEDOT(UV<sub>30</sub>).

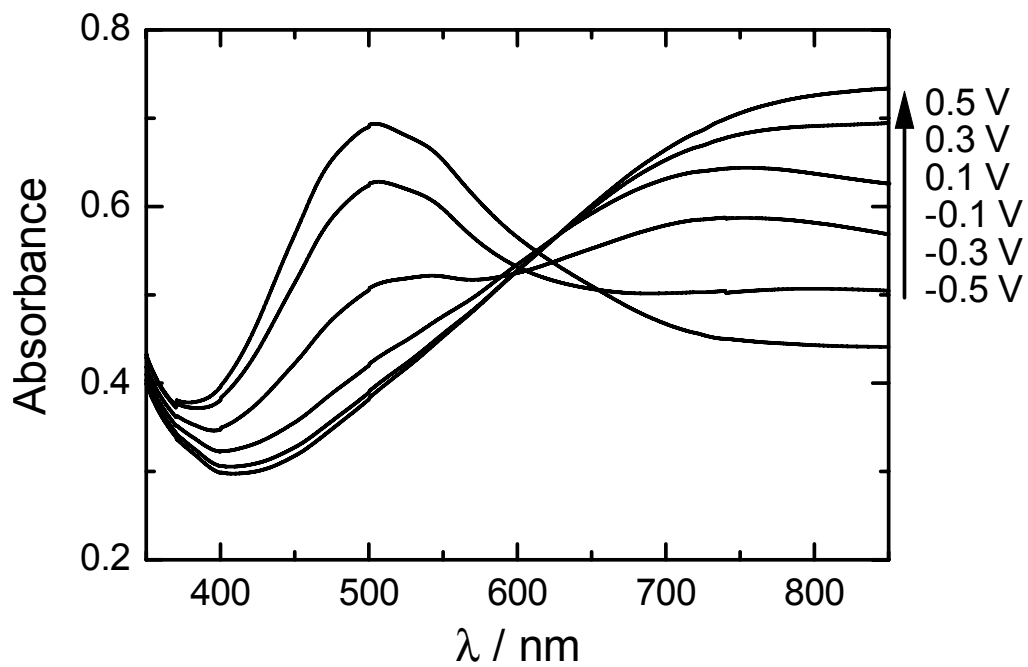

**Fig. S6.** Optical absorption spectra collected under voltage. Change in absorption of the polymer obtained after UV light irradiation for 30 min (*Pter*EDOT(UV<sub>30</sub>)) during the application of voltage.

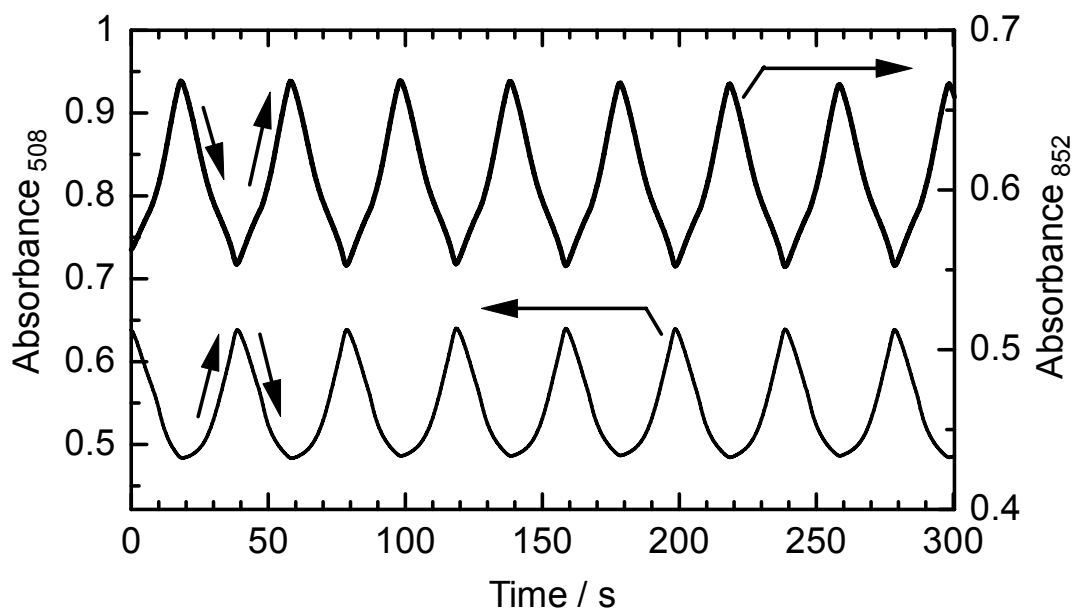

**Fig. S7.** Reversible changes in absorption for *Pter*EDOT (Vis) (the polymer prepared under Vis light) on ITO glass with repeated scanning between  $-0.5$  V and  $+0.5$  V vs.  $\text{Ag}/\text{Ag}^+$  as a reference electrode in a monomer-free 0.1 M TBAP/acetonitrile solution. (Thick line) Absorption at 852 nm. (Thin line) Absorption at 508 nm.



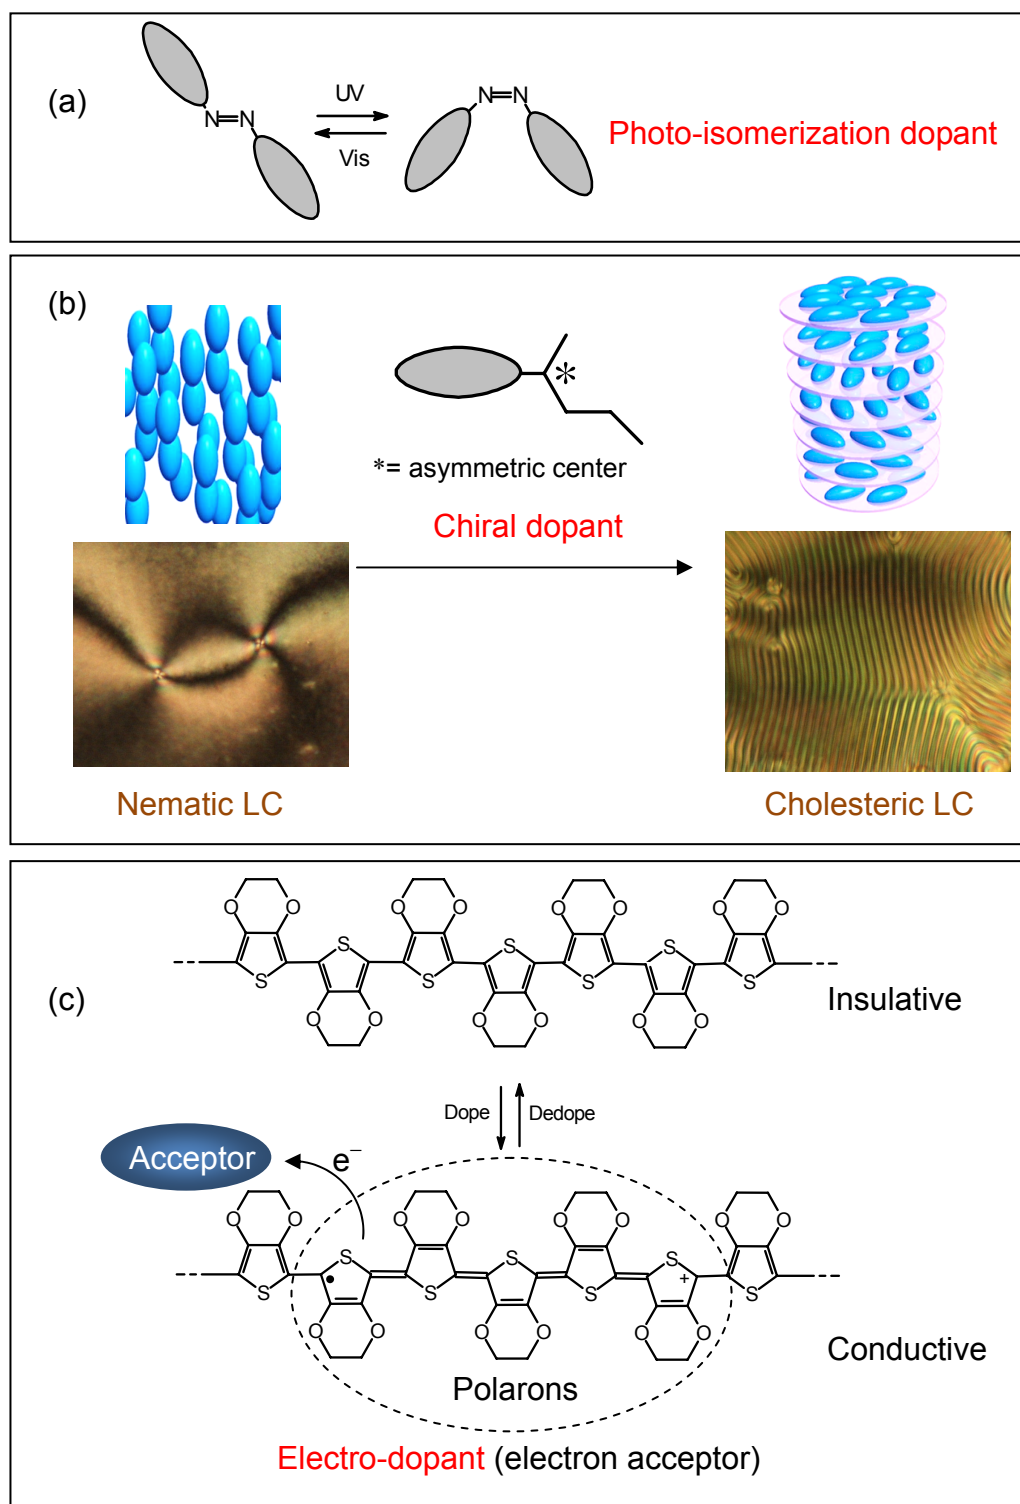

**Scheme S1.** Three categories of dopants. (a) Photo-isomerization dopant, (b) chiral dopant (although the illustration draws pseudo-layer for convenience, actually cholesteric LC has no pseudo-layer structure), (c) electro-dopant for generation of charged carriers.
